# Supplementary material
Source: PubMed Central journal article supplement (PMC4252737)
Supplement: NIHMS627198-supplement-supplement_1.pdf [file NIHMS627198-supplement-supplement_1.pdf]

Supplemental Table S1: RDS measures for sociodemographic characteristics; among Seattle participants in the 2011 NHBS-IDU3 survey: First randomization, **Group 1**

|                                                  | N   | RDS-<br>Adjusted<br>Estimate | Standard<br>Error | Design<br>Effect | Sample<br>Population<br>Proportion | Equilibrium<br>Estimate | Unadjusted<br>Network<br>Size | Homophily |
|--------------------------------------------------|-----|------------------------------|-------------------|------------------|------------------------------------|-------------------------|-------------------------------|-----------|
| <b>Age</b>                                       |     |                              |                   |                  |                                    |                         |                               |           |
| 18 - 29                                          | 53  | .171                         | .053              | 5.73             | .190                               | .150                    | 24.02                         | .494      |
| 30 - 39                                          | 79  | .247                         | .043              | 2.87             | .278                               | .267                    | 40.70                         | .130      |
| 40 - 49                                          | 79  | .220                         | .038              | 2.43             | .268                               | .290                    | 46.00                         | .172      |
| 50 +                                             | 78  | .362                         | .062              | 4.81             | .264                               | .292                    | 36.23                         | .226      |
| <b>Race</b>                                      |     |                              |                   |                  |                                    |                         |                               |           |
| White                                            | 186 | .595                         | .058              | 4.03             | .647                               | .631                    | 39.21                         | .170      |
| Black                                            | 29  | .217                         | .061              | 6.33             | .098                               | .115                    | 38.97                         | .270      |
| Hispanic                                         | 24  | .048                         | .013              | 1.07             | .081                               | .083                    | 36.96                         | .060      |
| Native American                                  | 9   | .018                         | .007              | 0.80             | .031                               | .029                    | 47.67                         | -1.00     |
| Multiple races                                   | 41  | .122                         | .028              | 2.12             | .142                               | .142                    | 29.45                         | -.088     |
| <b>Sex</b>                                       |     |                              |                   |                  |                                    |                         |                               |           |
| Male                                             | 166 | .518                         | .057              | 3.76             | .589                               | .586                    | 37.60                         | .268      |
| Female                                           | 116 | .482                         | .057              | 3.76             | .411                               | .414                    | 38.70                         | .034      |
| <b>Area of residence</b>                         |     |                              |                   |                  |                                    |                         |                               |           |
| North Seattle                                    | 62  | .196                         | .042              | 3.24             | .224                               | .228                    | 35.40                         | .262      |
| Downtown Seattle                                 | 104 | .316                         | .055              | 4.04             | .367                               | .365                    | 43.12                         | .381      |
| South Seattle                                    | 75  | .346                         | .062              | 4.91             | .273                               | .276                    | 33.71                         | .235      |
| South King County                                | 27  | .108                         | .047              | 6.63             | .101                               | .094                    | 37.45                         | .277      |
| East King County                                 | 10  | .033                         | .016              | 2.32             | .035                               | .036                    | 32.8                          | .195      |
| <b>Education</b>                                 |     |                              |                   |                  |                                    |                         |                               |           |
| < High school grad.                              | 70  | .262                         | .051              | 3.89             | .237                               | .25                     | 29.11                         | .112      |
| High school grad.                                | 110 | .395                         | .049              | 2.90             | .383                               | .379                    | 37.05                         | -.063     |
| Post high school                                 | 109 | .343                         | .050              | 3.21             | .380                               | .371                    | 44.25                         | .110      |
| <b>Drug most frequently injected<sup>a</sup></b> |     |                              |                   |                  |                                    |                         |                               |           |
| Heroin                                           | 240 | .857                         | .037              | 3.23             | .848                               | .829                    | 36.40                         | .208      |
| Speedballs                                       | 9   | .014                         | .005              | 0.52             | .031                               | .030                    | 42.89                         | -1.00     |
| Cocaine                                          | 5   | .025                         | .014              | 2.32             | .017                               | .017                    | 14.00                         | -1.00     |
| Amphetamines                                     | 29  | .104                         | .035              | 3.80             | .103                               | .124                    | 48.76                         | .488      |
| <b>Shared syringe<sup>a</sup></b>                |     |                              |                   |                  |                                    |                         |                               |           |
| No                                               | 189 | .706                         | .040              | 2.23             | .653                               | .661                    | 42.68                         | -.036     |
| Yes                                              | 99  | .294                         | .040              | 2.23             | .347                               | .339                    | 28.90                         | .119      |
| <b>Shared cooker<sup>a</sup></b>                 |     |                              |                   |                  |                                    |                         |                               |           |
| No                                               | 125 | .542                         | .050              | 2.91             | .432                               | .442                    | 41.30                         | -.052     |
| Yes                                              | 163 | .458                         | .050              | 2.91             | .568                               | .558                    | 35.37                         | .288      |
| <b>Backloaded<sup>a</sup></b>                    |     |                              |                   |                  |                                    |                         |                               |           |
| No                                               | 206 | .772                         | .034              | 1.90             | .714                               | .715                    | 39.13                         | -.067     |
| Yes                                              | 82  | .228                         | .034              | 1.90             | .286                               | .285                    | 34.97                         | .090      |

<sup>a</sup> Previous 12 months.

Supplemental Table S2: RDS measures for sexual, drug-associated and HIV- and HCV-related variables in the Seattle area NHBS-IDU2 population: First randomization, **Group 1**

|                                        | N   | RDS-<br>Adjusted<br>Estimate | Standard<br>Error | Design<br>Effect | Sample<br>Population<br>Proportion | Equilibrium<br>Estimate | Unadjusted<br>Network<br>Size | Homophily |
|----------------------------------------|-----|------------------------------|-------------------|------------------|------------------------------------|-------------------------|-------------------------------|-----------|
| <b>Male-to-male sex</b>                |     |                              |                   |                  |                                    |                         |                               |           |
| No                                     | 256 | .911                         | .023              | 1.89             | .901                               | .910                    | 38.66                         | .248      |
| Yes                                    | 26  | .089                         | .023              | 1.89             | .099                               | .090                    | 32.39                         | .255      |
| <b>Number sex partners</b>             |     |                              |                   |                  |                                    |                         |                               |           |
| 0                                      | 38  | .196                         | .050              | 4.58             | .135                               | .138                    | 46.90                         | .021      |
| 1                                      | 93  | .387                         | .053              | 3.42             | .336                               | .337                    | 27.17                         | -.049     |
| 2 – 4                                  | 95  | .279                         | .038              | 2.07             | .349                               | .345                    | 47.84                         | .021      |
| 5 – 9                                  | 27  | .082                         | .022              | 1.86             | .093                               | .097                    | 27.00                         | .010      |
| 10 +                                   | 24  | .056                         | .017              | 1.58             | .087                               | .084                    | 41.33                         | .068      |
| <b>Unprotected, non-concordant sex</b> |     |                              |                   |                  |                                    |                         |                               |           |
| None                                   | 182 | .733                         | .040              | 2.36             | .669                               | .662                    | 38.40                         | -.085     |
| Any                                    | 93  | .267                         | .040              | 2.36             | .331                               | .338                    | 37.34                         | .118      |
| <b>HIV test, 12 months</b>             |     |                              |                   |                  |                                    |                         |                               |           |
| No                                     | 116 | .487                         | .055              | 3.50             | .463                               | .473                    | 36.22                         | .009      |
| Yes                                    | 129 | .513                         | .055              | 3.50             | .537                               | .527                    | 39.65                         | .062      |
| <b>HIV test, 3 months</b>              |     |                              |                   |                  |                                    |                         |                               |           |
| No                                     | 190 | .829                         | .034              | 2.36             | .770                               | .776                    | 38.12                         | -.068     |
| Yes                                    | 55  | .171                         | .034              | 2.36             | .230                               | .224                    | 37.77                         | .054      |
| <b>Serologic HIV status</b>            |     |                              |                   |                  |                                    |                         |                               |           |
| Negative                               | 273 | .964                         | .021              | 3.67             | .949                               | .953                    | 37.43                         | .286      |
| Positive                               | 15  | .036                         | .021              | 3.67             | .051                               | .047                    | 46.20                         | .451      |
| <b>Serologic HCV status</b>            |     |                              |                   |                  |                                    |                         |                               |           |
| Negative                               | 86  | .29                          | .045              | 2.84             | .307                               | .305                    | 35.66                         | .227      |
| Positive                               | 199 | .71                          | .045              | 2.84             | .693                               | .695                    | 38.64                         | .169      |

Supplemental Table S3: RDS measures for sociodemographic characteristics; among Seattle participants in the 2011 NHBS-IDU3 survey: First randomization, **Group 2**

|                                                  | N   | RDS-<br>Adjusted<br>Estimate | Standard<br>Error | Design<br>Effect | Sample<br>Population<br>Proportion | Equilibrium<br>Estimate | Unadjusted<br>Network<br>Size | Homophily |
|--------------------------------------------------|-----|------------------------------|-------------------|------------------|------------------------------------|-------------------------|-------------------------------|-----------|
| <b>Age</b>                                       |     |                              |                   |                  |                                    |                         |                               |           |
| 18 - 29                                          | 44  | .100                         | .023              | 2.27             | .115                               | .115                    | 48.9                          | .034      |
| 30 - 39                                          | 89  | .205                         | .032              | 2.43             | .234                               | .229                    | 44.4                          | .068      |
| 40 - 49                                          | 107 | .288                         | .043              | 3.49             | .275                               | .278                    | 57.8                          | -.132     |
| 50 +                                             | 147 | .407                         | .044              | 3.10             | .377                               | .378                    | 41.0                          | .169      |
| <b>Race</b>                                      |     |                              |                   |                  |                                    |                         |                               |           |
| White                                            | 200 | .468                         | .054              | 4.53             | .519                               | .515                    | 55.5                          | .393      |
| Black                                            | 89  | .278                         | .051              | 5.01             | .226                               | .235                    | 30.2                          | .411      |
| Hispanic                                         | 38  | .097                         | .024              | 2.54             | .102                               | .096                    | 35.9                          | .073      |
| Native American                                  | 19  | .056                         | .020              | 2.93             | .048                               | .048                    | 30.8                          | .099      |
| Multiple races                                   | 41  | .101                         | .022              | 2.06             | .104                               | .107                    | 63.2                          | -.172     |
| <b>Sex</b>                                       |     |                              |                   |                  |                                    |                         |                               |           |
| Male                                             | 256 | .669                         | .041              | 2.94             | .670                               | .667                    | 46.7                          | .138      |
| Female                                           | 127 | .331                         | .041              | 2.94             | .330                               | .333                    | 49.4                          | .144      |
| <b>Area of residence</b>                         |     |                              |                   |                  |                                    |                         |                               |           |
| North Seattle                                    | 59  | .173                         | .035              | 3.31             | .161                               | .173                    | 43.7                          | .270      |
| Downtown Seattle                                 | 153 | .438                         | .052              | 4.25             | .414                               | .413                    | 44.5                          | .313      |
| South Seattle                                    | 87  | .220                         | .036              | 2.92             | .240                               | .235                    | 53.8                          | .207      |
| South King County                                | 52  | .139                         | .034              | 3.74             | .145                               | .134                    | 47.6                          | .348      |
| East King County                                 | 15  | .029                         | .012              | 1.98             | .040                               | .044                    | 47.5                          | .338      |
| <b>Education</b>                                 |     |                              |                   |                  |                                    |                         |                               |           |
| < High school grad.                              | 107 | .228                         | .030              | 1.98             | .276                               | .275                    | 49.0                          | .109      |
| High school grad.                                | 155 | .405                         | .043              | 2.97             | .406                               | .401                    | 49.1                          | -.054     |
| Post high school                                 | 124 | .367                         | .041              | 2.80             | .319                               | .324                    | 43.8                          | .012      |
| <b>Drug most frequently injected<sup>a</sup></b> |     |                              |                   |                  |                                    |                         |                               |           |
| Heroin                                           | 326 | .777                         | .053              | 6.27             | .849                               | .868                    | 50.2                          | .609      |
| Speedballs                                       | 22  | .051                         | .015              | 1.80             | .056                               | .055                    | 39.1                          | .141      |
| Cocaine                                          | 4   | .019                         | .012              | 2.99             | .010                               | .010                    | 19.3                          | -.999     |
| Amphetamines                                     | 29  | .153                         | .052              | 8.08             | .085                               | .067                    | 21.1                          | .373      |
| <b>Shared syringe<sup>a</sup></b>                |     |                              |                   |                  |                                    |                         |                               |           |
| No                                               | 266 | .763                         | .031              | 2.06             | .691                               | .690                    | 48.2                          | -.059     |
| Yes                                              | 120 | .237                         | .031              | 2.06             | .309                               | .310                    | 45.5                          | .175      |
| <b>Shared cooker<sup>a</sup></b>                 |     |                              |                   |                  |                                    |                         |                               |           |
| No                                               | 155 | .487                         | .045              | 3.14             | .404                               | .407                    | 45.8                          | -.075     |
| Yes                                              | 228 | .513                         | .045              | 3.14             | .596                               | .593                    | 48.6                          | .225      |
| <b>Backloaded<sup>a</sup></b>                    |     |                              |                   |                  |                                    |                         |                               |           |
| No                                               | 269 | .770                         | .031              | 2.10             | .699                               | .698                    | 46.5                          | -.070     |
| Yes                                              | 117 | .230                         | .031              | 2.10             | .301                               | .302                    | 49.3                          | .144      |

<sup>a</sup> Previous 12 months.

Supplemental Table S4: RDS measures for sexual, drug-associated and HIV- and HCV-related variables in the Seattle area NHBS-IDU2 population: First randomization, **Group 2**

|                                        | N   | RDS-<br>Adjusted<br>Estimate | Standard<br>Error | Design<br>Effect | Sample<br>Population<br>Proportion | Equilibrium<br>Estimate | Unadjusted<br>Network<br>Size | Homophily |
|----------------------------------------|-----|------------------------------|-------------------|------------------|------------------------------------|-------------------------|-------------------------------|-----------|
| <b>Male-to-male sex</b>                |     |                              |                   |                  |                                    |                         |                               |           |
| No                                     | 349 | .856                         | .052              | 8.49             | .908                               | .925                    | 49.3                          | .717      |
| Yes                                    | 33  | .144                         | .052              | 8.49             | .092                               | .075                    | 29.7                          | .416      |
| <b>Number sex partners</b>             |     |                              |                   |                  |                                    |                         |                               |           |
| 0                                      | 71  | .165                         | .027              | 2.05             | .185                               | .190                    | 54.6                          | .128      |
| 1                                      | 146 | .409                         | .044              | 3.10             | .378                               | .382                    | 50.4                          | .030      |
| 2 – 4                                  | 103 | .299                         | .037              | 2.53             | .270                               | .269                    | 34.0                          | -.070     |
| 5 – 9                                  | 26  | .064                         | .018              | 2.09             | .072                               | .072                    | 40.9                          | -.348     |
| 10 +                                   | 33  | .064                         | .016              | 1.65             | .095                               | .087                    | 68.9                          | .041      |
| <b>Unprotected, non-concordant sex</b> |     |                              |                   |                  |                                    |                         |                               |           |
| None                                   | 279 | .774                         | .031              | 2.13             | .728                               | .740                    | 49.7                          | -.019     |
| Any                                    | 100 | .226                         | .031              | 2.13             | .272                               | .260                    | 42.0                          | .117      |
| <b>HIV test, 12 months</b>             |     |                              |                   |                  |                                    |                         |                               |           |
| No                                     | 178 | .621                         | .040              | 2.63             | .576                               | .584                    | 45.9                          | -.065     |
| Yes                                    | 127 | .379                         | .040              | 2.63             | .424                               | .416                    | 54.6                          | .051      |
| <b>HIV test, 3 months</b>              |     |                              |                   |                  |                                    |                         |                               |           |
| No                                     | 258 | .842                         | .031              | 2.80             | .847                               | .847                    | 48.6                          | .000      |
| Yes                                    | 47  | .158                         | .031              | 2.80             | .153                               | .153                    | 55.3                          | -.210     |
| <b>Serologic HIV status</b>            |     |                              |                   |                  |                                    |                         |                               |           |
| Negative                               | 346 | .818                         | .063              | 10.32            | .893                               | .910                    | 49.7                          | .791      |
| Positive                               | 40  | .182                         | .063              | 10.32            | .107                               | .090                    | 22.3                          | .528      |
| <b>Serologic HCV status</b>            |     |                              |                   |                  |                                    |                         |                               |           |
| Negative                               | 89  | .315                         | .044              | 3.47             | .240                               | .237                    | 38.6                          | .205      |
| Positive                               | 285 | .685                         | .044              | 3.47             | .760                               | .763                    | 49.8                          | .463      |

Table S5: Details of Randomization by recruitment chain procedure:  
 Seattle area participants in the 2011 NBHS IDU3 survey: **Second randomization**

| Recruitment chain | N participants | N waves | Random number | Cumulative number group 1 | Cumulative number group 2 | Difference group1:group2 |         |
|-------------------|----------------|---------|---------------|---------------------------|---------------------------|--------------------------|---------|
| 2                 | 156            | 13      | .17           | 156                       | 532                       | 376                      | Group 1 |
| 8                 | 152            | 14      | .19           | 308                       | 380                       | 72                       |         |
| 9                 | 42             | 8       | .24           | 350                       | 338                       | 12                       |         |
| 6                 | 229            | 15      | .71           | 579                       | 109                       | 470                      | Group 2 |
| 7                 | 6              | 2       | .74           | 585                       | 103                       | 482                      |         |
| 4                 | 10             | 3       | .74           | 595                       | 93                        | 502                      |         |
| 1                 | 65             | 12      | .81           | 660                       | 28                        | 632                      |         |
| 3                 | 27             | 7       | .83           | 687                       | 1                         | 686                      |         |
| 5                 | 1              | 0       | .86           | 688                       | 0                         | 688                      |         |

Figure S1: Random groups defined by recruitment chains among Seattle-area participants in the 2012 NBHS IDU survey, **Second randomization**: Yellow = Group 1; Blue = Group 2; Enlarged circles = seeds; Numbers = Recruitment chain

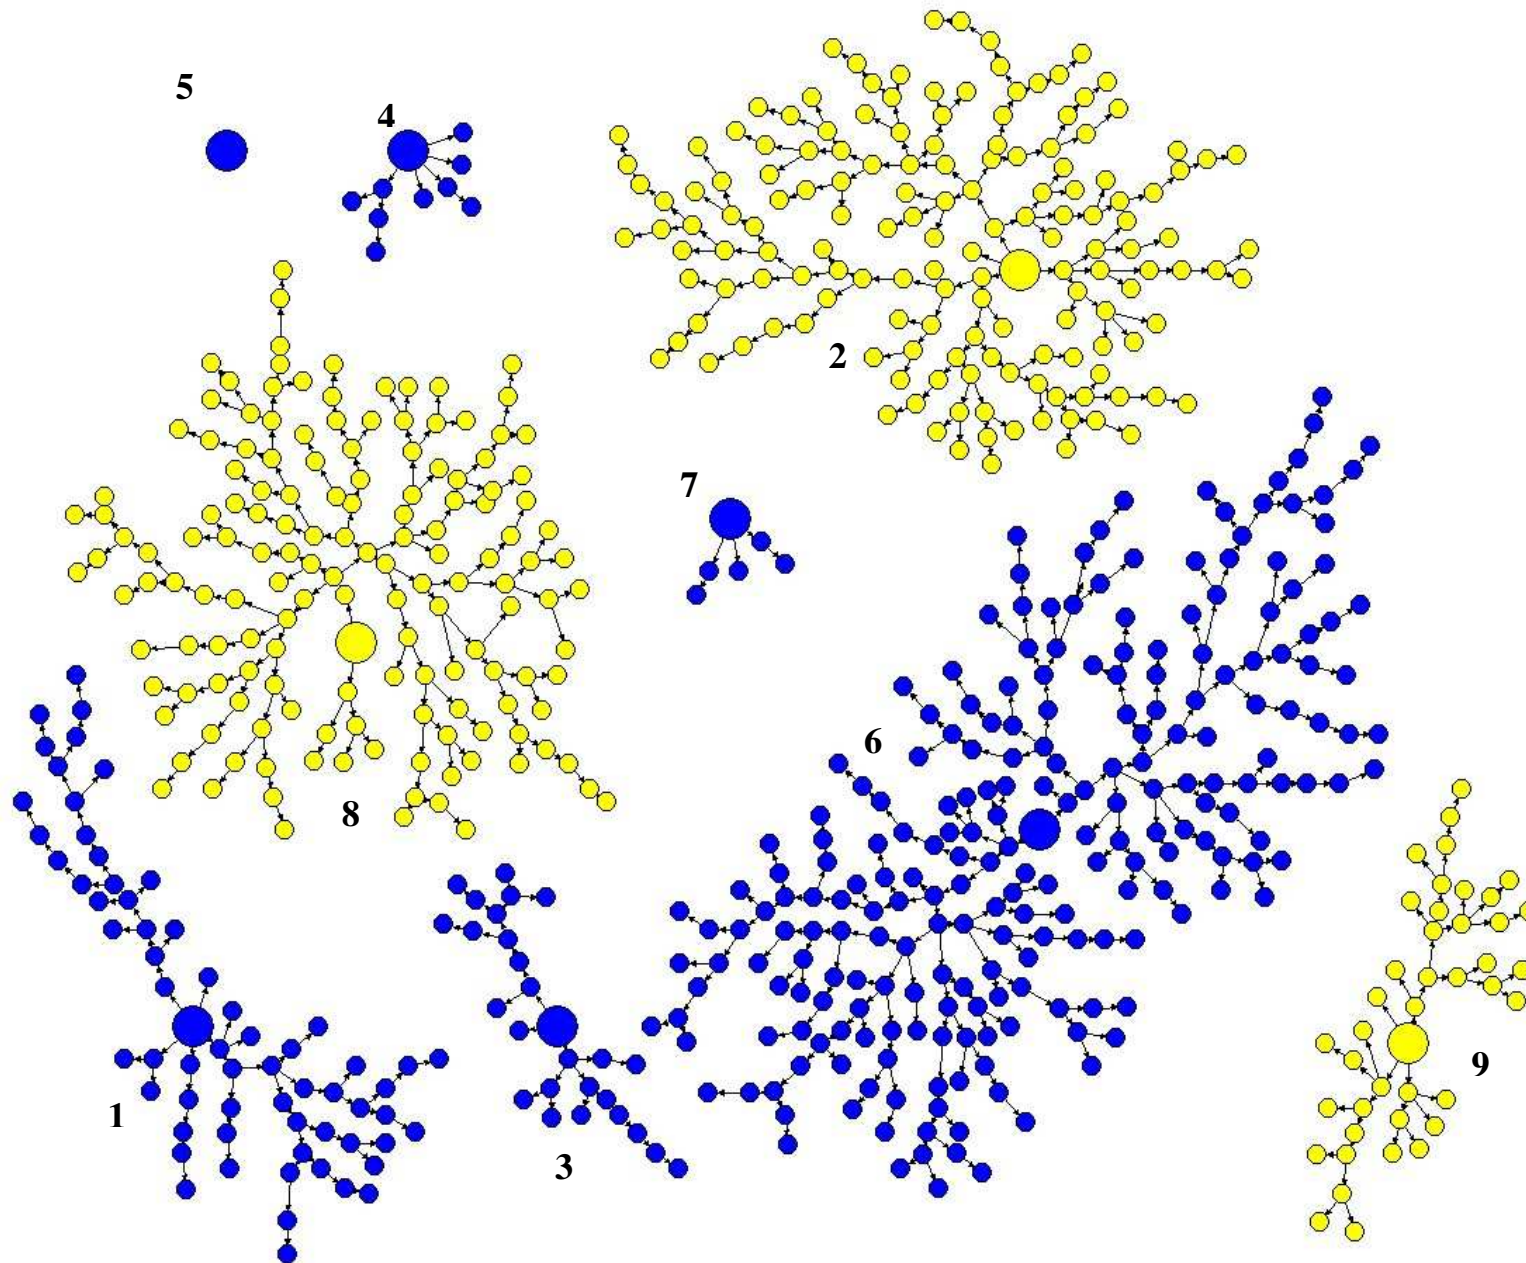

Table S6: Comparing sociodemographics and drug related variables between groups defined by recruitment chain among Seattle-area participants in the 2011 NHBS-IDU3 survey: **Second Randomization**

|                                  | <b>Group 1</b><br>(Chains 2,8,9) |           | <b>Group 2</b><br>(Chains 1,3,4,5,6,7) |           | <b>Statistical tests</b> |                                              |
|----------------------------------|----------------------------------|-----------|----------------------------------------|-----------|--------------------------|----------------------------------------------|
|                                  | RDS-<br>adjusted<br>estimate     | 95% C.I.  | RDS-<br>adjusted<br>estimate           | 95% C.I.  | p-value                  | Non-<br>overlapping<br>95% C.I. <sup>a</sup> |
| <b>Age</b>                       | <b>(Percentages)</b>             |           |                                        |           |                          |                                              |
| 18 – 29                          | 10                               | (5 - 15)  | 17                                     | (9 - 26)  | .004                     |                                              |
| 30 – 39                          | 19                               | (14 - 26) | 24                                     | (17 - 33) |                          |                                              |
| 40 – 49                          | 28                               | (21 - 35) | 23                                     | (16 - 33) |                          |                                              |
| ≥ 50                             | 43                               | (34 - 52) | 35                                     | (25 - 47) |                          |                                              |
| <b>Race</b>                      |                                  |           |                                        |           | 5 x 10 <sup>-9</sup>     | yes                                          |
| White                            | 39                               | (30 - 49) | 63                                     | (51 - 73) |                          |                                              |
| Black                            | 33                               | (23 - 44) | 19                                     | (9 - 31)  |                          |                                              |
| Hispanic                         | 11                               | (6 - 17)  | 4                                      | (3 - 7)   |                          |                                              |
| Other race                       | 5                                | (2 - 9)   | 3                                      | (1 - 6)   |                          |                                              |
| Multiple races                   | 11                               | (7 - 17)  | 11                                     | (7 - 17)  |                          |                                              |
| <b>Sex</b>                       |                                  |           |                                        |           | 2 x 10 <sup>-4</sup>     |                                              |
| Male                             | 67                               | (59 - 75) | 54                                     | (43 - 64) |                          |                                              |
| Female                           | 33                               | (25 - 41) | 47                                     | (36 - 57) |                          |                                              |
| <b>Area of residence</b>         |                                  |           |                                        |           | .08                      |                                              |
| North Seattle                    | 19                               | (12 - 27) | 19                                     | (12 - 26) |                          |                                              |
| Downtown Seattle                 | 43                               | (33 - 52) | 34                                     | (23 - 46) |                          |                                              |
| South Seattle                    | 26                               | (19 - 34) | 30                                     | (20 - 42) |                          |                                              |
| South King County                | 9                                | (5 - 15)  | 14                                     | (6 - 25)  |                          |                                              |
| East King County                 | 3                                | (1 - 5)   | 3                                      | (1 - 7)   |                          |                                              |
| <b>Education</b>                 |                                  |           |                                        |           | .38                      |                                              |
| < High school grad.              | 24                               | (19 - 31) | 25                                     | (17 - 35) |                          |                                              |
| High school grad.                | 37                               | (30 - 45) | 42                                     | (32 - 51) |                          |                                              |
| Post high school                 | 39                               | (30 - 46) | 34                                     | (24 - 43) |                          |                                              |
| <b>Primary injection drug</b>    |                                  |           |                                        |           | .003                     | yes                                          |
| Heroin                           | 80                               | (71 - 88) | 81                                     | (69 - 91) |                          |                                              |
| Speedballs                       | 6                                | (3 - 10)  | 1                                      | (0 - 2)   |                          |                                              |
| Cocaine                          | 2                                | (0 - 5)   | 2                                      | (0 - 5)   |                          |                                              |
| Amphetamines                     | 12                               | (5 - 20)  | 15                                     | (6 - 28)  |                          |                                              |
| <b>Shared Needle<sup>b</sup></b> |                                  |           |                                        |           | .60                      |                                              |
| No                               | 75                               | (68 - 81) | 73                                     | (65 - 80) |                          |                                              |
| Yes                              | 25                               | (20 - 32) | 27                                     | (20 - 35) |                          |                                              |
| <b>Shared Cooker<sup>b</sup></b> |                                  |           |                                        |           | .006                     |                                              |
| No                               | 45                               | (37 - 53) | 56                                     | (46 - 65) |                          |                                              |
| Yes                              | 55                               | (47 - 63) | 44                                     | (35 - 54) |                          |                                              |
| <b>Backloaded<sup>b</sup></b>    |                                  |           |                                        |           | .30                      |                                              |
| No                               | 75                               | (68 - 81) | 79                                     | (73 - 85) |                          |                                              |
| Yes                              | 26                               | (19 - 33) | 21                                     | (15 - 27) |                          |                                              |
| N (total)                        | 280                              |           | 408                                    |           |                          |                                              |

<sup>a</sup> Variable categories in which the 95% confidence intervals of the two groups had no overlap are indicated with 'yes'.

<sup>b</sup> Previous 12 months.

Table S7: Comparing sexual, HIV and HCV- related variables between randomly assigned groups defined by recruitment chain among Seattle-area participants in the 2011 NHBS-IDU3 survey: **Second randomization**

|                                                           | <b>Group 1</b><br>(Chains 2,8,9) |           | <b>Group 2</b><br>(Chains 1,3,4,5,6,7) |           | <b>Statistical tests</b> |                                 |
|-----------------------------------------------------------|----------------------------------|-----------|----------------------------------------|-----------|--------------------------|---------------------------------|
|                                                           | RDS-<br>adjusted<br>estimate     | 95% C.I.  | RDS-<br>adjusted<br>estimate           | 95% C.I.  | p-value                  | Non-<br>overlapping<br>95% C.I. |
| <b>Male-to-male sex<sup>a</sup></b>                       | <b>(Percentages)</b>             |           |                                        |           |                          |                                 |
| No                                                        | 90                               | (82 - 96) | 87                                     | (77 - 95) | .26                      |                                 |
| Yes                                                       | 10                               | (5 - 18)  | 13                                     | (5 - 23)  |                          |                                 |
| <b>Number sex partners<sup>a</sup></b>                    |                                  |           |                                        |           | .43                      |                                 |
| 0                                                         | 17                               | (11 - 22) | 19                                     | (11 - 28) |                          |                                 |
| 1                                                         | 38                               | (31 - 47) | 41                                     | (32 - 52) |                          |                                 |
| 2 - 4                                                     | 31                               | (24 - 38) | 27                                     | (20 - 34) |                          |                                 |
| 5 - 9                                                     | 7                                | (4 - 12)  | 7                                      | (4 - 11)  |                          |                                 |
| 10 +                                                      | 8                                | (4 - 11)  | 5                                      | (3 - 8)   |                          |                                 |
| <b>Unprotected, non-<br/>concordant sex<sup>a,b</sup></b> |                                  |           |                                        |           | .82                      |                                 |
| No                                                        | 76                               | (69 - 82) | 75                                     | (67 - 82) |                          |                                 |
| Yes                                                       | 24                               | (18 - 31) | 25                                     | (18 - 33) |                          |                                 |
| <b>HIV test, 12 months</b>                                |                                  |           |                                        |           | .008                     |                                 |
| No                                                        | 61                               | (54 - 70) | 51                                     | (40 - 61) |                          |                                 |
| Yes                                                       | 39                               | (30 - 47) | 49                                     | (39 - 60) |                          |                                 |
| <b>HIV test, 3 months</b>                                 |                                  |           |                                        |           | .64                      |                                 |
| No                                                        | 84                               | (77 - 91) | 83                                     | (76 - 88) |                          |                                 |
| Yes                                                       | 16                               | (10 - 23) | 17                                     | (12 - 24) |                          |                                 |
| <b>Serologic HIV status</b>                               |                                  |           |                                        |           | .007                     |                                 |
| Negative                                                  | 85                               | (74 - 95) | 92                                     | (82 - 99) |                          |                                 |
| Positive                                                  | 15                               | (5 - 26)  | 8                                      | (1 - 18)  |                          |                                 |
| <b>Serologic HCV status</b>                               |                                  |           |                                        |           | .77                      |                                 |
| Negative                                                  | 31                               | (22 - 40) | 30                                     | (22 - 38) |                          |                                 |
| Positive                                                  | 69                               | (60 - 78) | 70                                     | (62 - 79) |                          |                                 |
| N (total)                                                 | 280                              |           | 408                                    |           |                          |                                 |

<sup>a</sup> Previous 12 months

<sup>b</sup> Vaginal or anal sex without a condom with a partner of unknown HIV status or a status opposite to that of the participant.



Table S8: Details of Randomization by recruitment chain procedure:  
 Seattle area participants in the 2011 NBHS IDU3 survey: **Third randomization**

| Recruitment chain | N participants | N waves | Random number | Cumulative number group 1 | Cumulative number group 2 | Difference group1:group2 |         |
|-------------------|----------------|---------|---------------|---------------------------|---------------------------|--------------------------|---------|
| 6                 | 229            | 15      | .09           | 229                       | 459                       | 230                      | Group 1 |
| 3                 | 27             | 7       | .17           | 256                       | 432                       | 176                      |         |
| 2                 | 156            | 13      | .21           | 412                       | 276                       | 136                      |         |
| 9                 | 42             | 8       | .27           | 454                       | 234                       | 220                      | Group 2 |
| 1                 | 65             | 12      | .48           | 519                       | 169                       | 350                      |         |
| 8                 | 152            | 14      | .48           | 671                       | 17                        | 654                      |         |
| 4                 | 10             | 3       | .51           | 681                       | 7                         | 674                      |         |
| 7                 | 6              | 2       | .72           | 687                       | 1                         | 686                      |         |
| 5                 | 1              | 0       | .77           | 688                       | 0                         | 688                      |         |

Figure S2: Random groups defined by recruitment chains among Seattle-area participants in the 2011 NBHS IDU survey, **Third randomization:**  
Yellow = Group 1; Blue = Group 2; Enlarged circles = seeds; Numbers = Recruitment chain

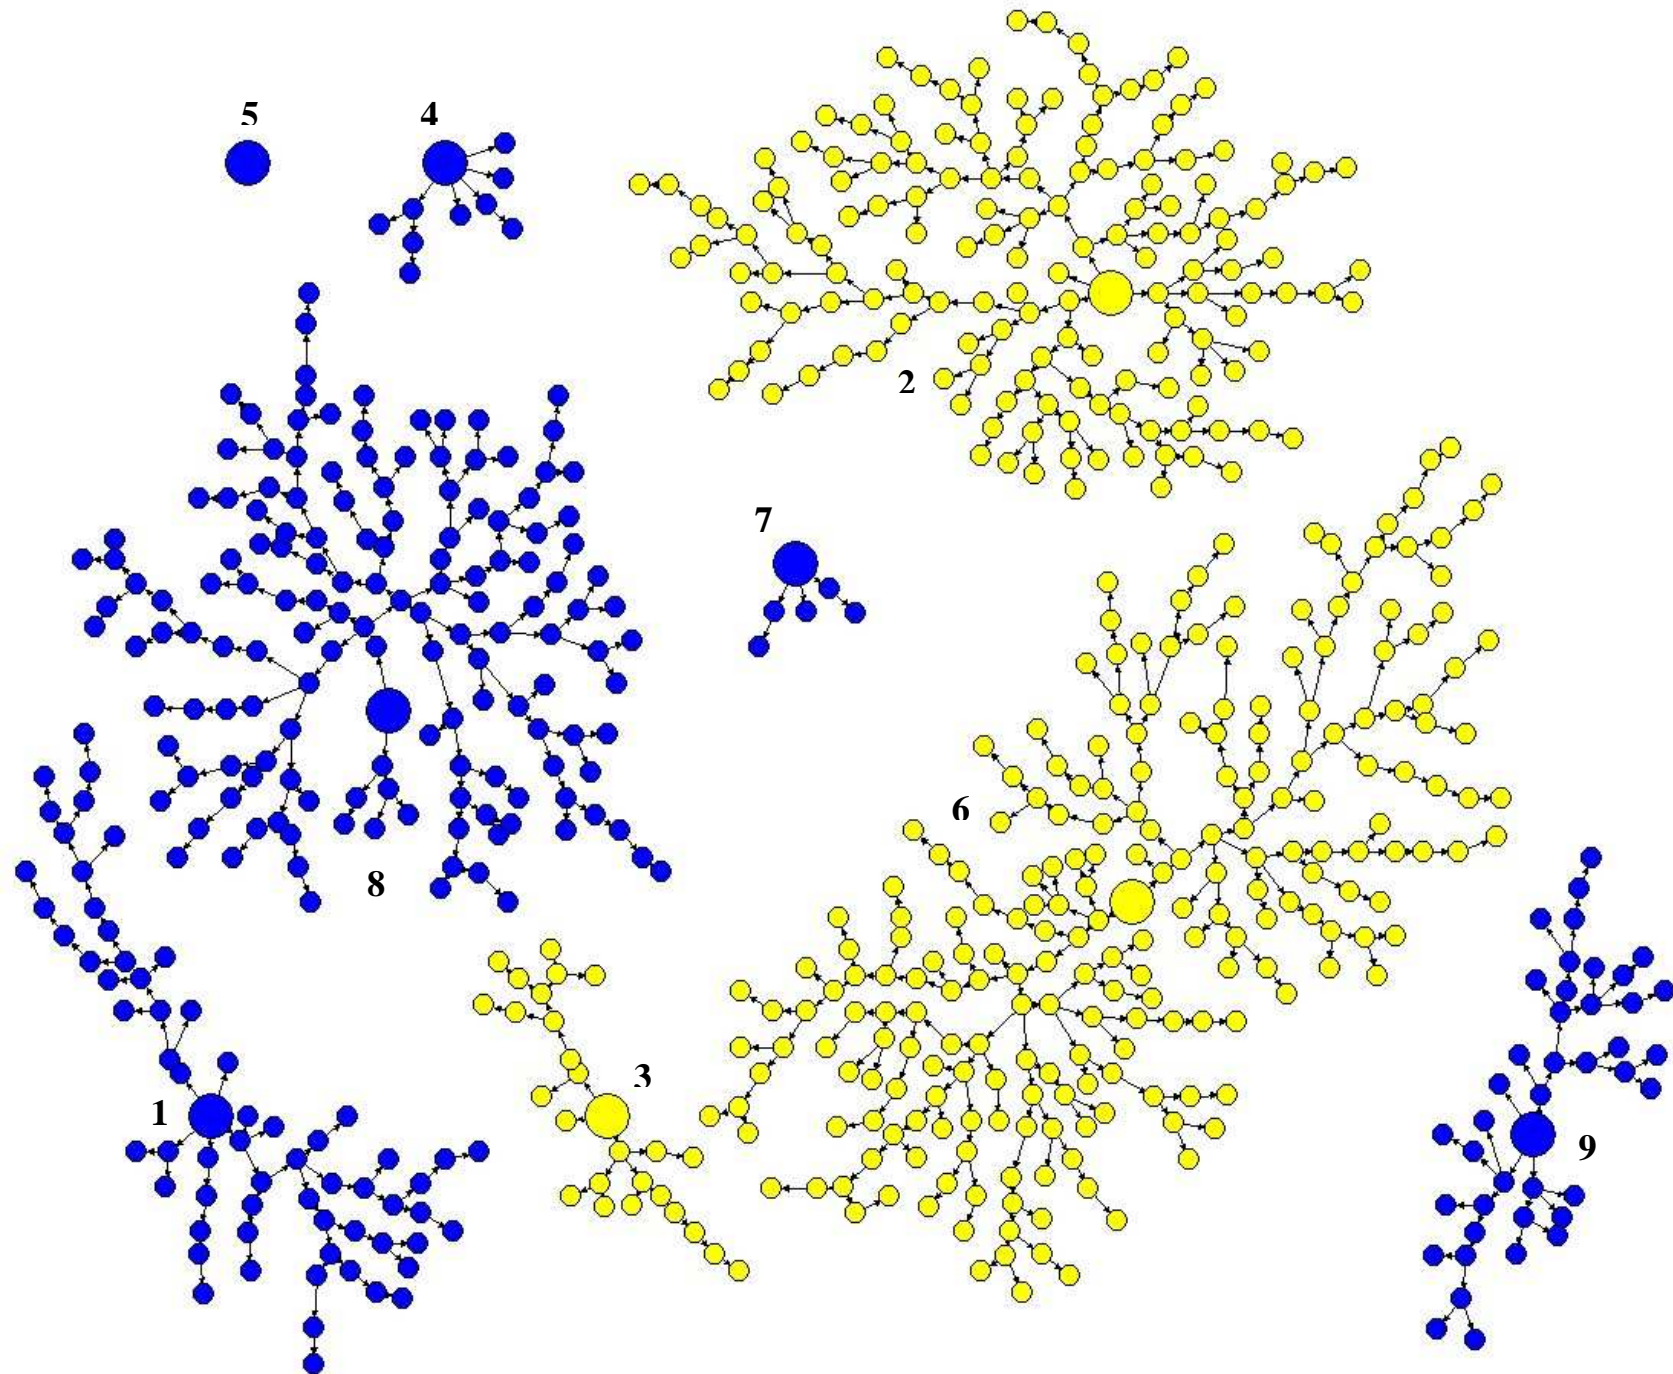

Table S9: Comparing sociodemographics and drug related variables between groups defined by recruitment chain among Seattle-area participants in the 2011 NHBS-IDU3 survey: **Third randomization**

|                                  | <b>Group 1</b>               |           | <b>Group 2</b>               |           | <b>Statistical tests</b> |                                 |
|----------------------------------|------------------------------|-----------|------------------------------|-----------|--------------------------|---------------------------------|
|                                  | RDS-<br>adjusted<br>estimate | 95% C.I.  | RDS-<br>adjusted<br>estimate | 95% C.I.  | p-value                  | Non-<br>overlapping<br>95% C.I. |
| <b>Age</b>                       | <b>(Percentages)</b>         |           |                              |           |                          |                                 |
| 18 – 29                          | 15                           | (8 - 23)  | 14                           | (8 - 22)  | .04                      |                                 |
| 30 – 39                          | 23                           | (17 - 30) | 22                           | (15 - 30) |                          |                                 |
| 40 – 49                          | 21                           | (16 - 28) | 31                           | (21 - 42) |                          |                                 |
| ≥ 50                             | 41                           | (32 - 51) | 34                           | (24 - 44) |                          |                                 |
| <b>Race</b>                      |                              |           |                              |           | 7 x 10 <sup>-9</sup>     |                                 |
| White                            | 58                           | (47 - 68) | 43                           | (31 - 55) |                          |                                 |
| Black                            | 27                           | (16 - 38) | 23                           | (14 - 35) |                          |                                 |
| Hispanic                         | 6                            | (3 - 9)   | 10                           | (6 - 17)  |                          |                                 |
| Other race                       | 1                            | (0 - 2)   | 9                            | (4 - 15)  |                          | yes                             |
| Multiple races                   | 9                            | (5 - 14)  | 14                           | (9 - 20)  |                          |                                 |
| <b>Sex</b>                       |                              |           |                              |           | .002                     |                                 |
| Male                             | 55                           | (46 - 64) | 67                           | (58 - 76) |                          |                                 |
| Female                           | 45                           | (36 - 54) | 33                           | (24 - 43) |                          |                                 |
| <b>Area of residence</b>         |                              |           |                              |           | 8 x 10 <sup>-4</sup>     |                                 |
| North Seattle                    | 18                           | (11 - 25) | 19                           | (12 - 28) |                          |                                 |
| Downtown Seattle                 | 33                           | (25 - 42) | 48                           | (35 - 60) |                          |                                 |
| South Seattle                    | 31                           | (22 - 41) | 23                           | (14 - 32) |                          |                                 |
| South King County                | 15                           | (7 - 23)  | 10                           | (3 - 18)  |                          |                                 |
| East King County                 | 4                            | (1 - 8)   | 2                            | (0 - 4)   |                          |                                 |
| <b>Education</b>                 |                              |           |                              |           | .19                      |                                 |
| < High school grad.              | 24                           | (17 - 33) | 25                           | (17 - 33) |                          |                                 |
| High school grad.                | 43                           | (35 - 51) | 36                           | (26 - 47) |                          |                                 |
| Post high school                 | 33                           | (25 - 41) | 39                           | (30 - 49) |                          |                                 |
| <b>Primary injection drug</b>    |                              |           |                              |           | .04                      |                                 |
| Heroin                           | 85                           | (78 - 91) | 76                           | (63 - 88) |                          |                                 |
| Speedballs                       | 3                            | (1 - 5)   | 4                            | (1 - 8)   |                          |                                 |
| Cocaine                          | 2                            | (0 - 4)   | 3                            | (0 - 7)   |                          |                                 |
| Amphetamines                     | 11                           | (5 - 17)  | 17                           | (6 - 30)  |                          |                                 |
| <b>Shared Needle<sup>a</sup></b> |                              |           |                              |           | .03                      |                                 |
| No                               | 71                           | (64 - 77) | 78                           | (71 - 86) |                          |                                 |
| Yes                              | 29                           | (23 - 36) | 22                           | (15 - 29) |                          |                                 |
| <b>Shared Cooker<sup>a</sup></b> |                              |           |                              |           | .90                      |                                 |
| No                               | 52                           | (43 - 60) | 50                           | (40 - 61) |                          |                                 |
| Yes                              | 48                           | (40 - 57) | 50                           | (39 - 60) |                          |                                 |
| <b>Backloaded<sup>a</sup></b>    |                              |           |                              |           | .23                      |                                 |
| No                               | 75                           | (69 - 81) | 80                           | (73 - 86) |                          |                                 |
| Yes                              | 25                           | (19 - 31) | 20                           | (14 - 27) |                          |                                 |
| N (total)                        | 412                          |           | 276                          |           |                          |                                 |

<sup>a</sup> Previous 12 months.

Table S10: Comparing sexual, HIV and HCV- related variables between randomly assigned groups defined by recruitment chain among Seattle-area participants in the 2011 NHBS-IDU3 survey: **Third randomization**

|                                                      | <b>Group 1</b>               |            | <b>Group 2</b>               |           | <b>Statistical tests</b> |                                 |
|------------------------------------------------------|------------------------------|------------|------------------------------|-----------|--------------------------|---------------------------------|
|                                                      | RDS-<br>adjusted<br>estimate | 95% C.I.   | RDS-<br>adjusted<br>estimate | 95% C.I.  | p-value                  | Non-<br>overlapping<br>95% C.I. |
| <b>Male-to-male sex<sup>a</sup></b>                  | <b>(Percentages)</b>         |            |                              |           |                          |                                 |
| No                                                   | 92                           | (89 - 97)  | 82                           | (68 - 94) | 3 x 10 <sup>-5</sup>     |                                 |
| Yes                                                  | 8                            | (4 - 11)   | 18                           | (6 - 32)  |                          |                                 |
| <b>Number sex partners<sup>a</sup></b>               |                              |            |                              |           |                          |                                 |
| 0                                                    | 21                           | (13 - 28)  | 14                           | (9 - 21)  | .03                      |                                 |
| 1                                                    | 41                           | (34 - 51)  | 37                           | (27 - 47) |                          |                                 |
| 2 - 4                                                | 26                           | (20 - 32)  | 34                           | (25 - 43) |                          |                                 |
| 5 - 9                                                | 6                            | (4 - 10)   | 8                            | (4 - 14)  |                          |                                 |
| 10 +                                                 | 5                            | (3 - 8)    | 7                            | (3 - 11)  |                          |                                 |
| <b>Unprotected, non-concordant sex<sup>a,b</sup></b> |                              |            |                              |           |                          |                                 |
| No                                                   | 72                           | (65 - 79)  | 81                           | (74 - 87) | .009                     |                                 |
| Yes                                                  | 28                           | (22 - 35)  | 19                           | (13 - 26) |                          |                                 |
| <b>HIV test, 12 months</b>                           |                              |            |                              |           |                          |                                 |
| No                                                   | 51                           | (41 - 60)  | 65                           | (57 - 74) | 5 x 10 <sup>-4</sup>     |                                 |
| Yes                                                  | 49                           | (40 - 59)  | 35                           | (26 - 43) |                          |                                 |
| <b>HIV test, 3 months</b>                            |                              |            |                              |           |                          |                                 |
| No                                                   | 84                           | (78 - 89)  | 83                           | (74 - 89) | .69                      |                                 |
| Yes                                                  | 16                           | (11 - 22)  | 17                           | (11 - 26) |                          |                                 |
| <b>Serologic HIV status</b>                          |                              |            |                              |           |                          |                                 |
| Negative                                             | 97                           | (93 - 100) | 75                           | (59 - 91) | < 10 <sup>-16</sup>      | yes                             |
| Positive                                             | 3                            | (1 - 7)    | 25                           | (9 - 42)  |                          | yes                             |
| <b>Serologic HCV status</b>                          |                              |            |                              |           |                          |                                 |
| Negative                                             | 29                           | (22 - 37)  | 32                           | (22 - 42) | .52                      |                                 |
| Positive                                             | 71                           | (63 - 78)  | 68                           | (58 - 78) |                          |                                 |
| N (total)                                            | 412                          |            | 276                          |           |                          |                                 |

<sup>a</sup> Previous 12 months

<sup>b</sup> Vaginal or anal sex without a condom with a partner of unknown HIV status or a status opposite to that of the participant.

Table S11: Details of Randomization by recruitment chain procedure:  
 Seattle area participants in the 2011 NBHS IDU3 survey: **Fourth randomization**

| Recruitment chain | N participants | N waves | Random number | Cumulative number group 1 | Cumulative number group 2 | Difference group1:group2 |         |
|-------------------|----------------|---------|---------------|---------------------------|---------------------------|--------------------------|---------|
| 4                 | 10             | 3       | .18           | 10                        | 678                       | 668                      | Group 1 |
| 7                 | 6              | 2       | .26           | 16                        | 672                       | 656                      |         |
| 6                 | 229            | 15      | .32           | 245                       | 443                       | 198                      |         |
| 8                 | 152            | 14      | .33           | 397                       | 291                       | 106                      |         |
| 1                 | 65             | 12      | .65           | 462                       | 226                       | 236                      | Group 2 |
| 2                 | 156            | 13      | .83           | 618                       | 70                        | 548                      |         |
| 9                 | 42             | 8       | .85           | 660                       | 28                        | 632                      |         |
| 5                 | 1              | 0       | .88           | 661                       | 27                        | 634                      |         |
| 3                 | 27             | 7       | .96           | 688                       | 0                         | 688                      |         |

Figure S3: Random groups defined by recruitment chains among Seattle-area participants in the 2012 NBHS IDU survey, **Fourth randomization**: Yellow = Group 1; Blue = Group 2; Enlarged circles = seeds; Numbers = Recruitment chain

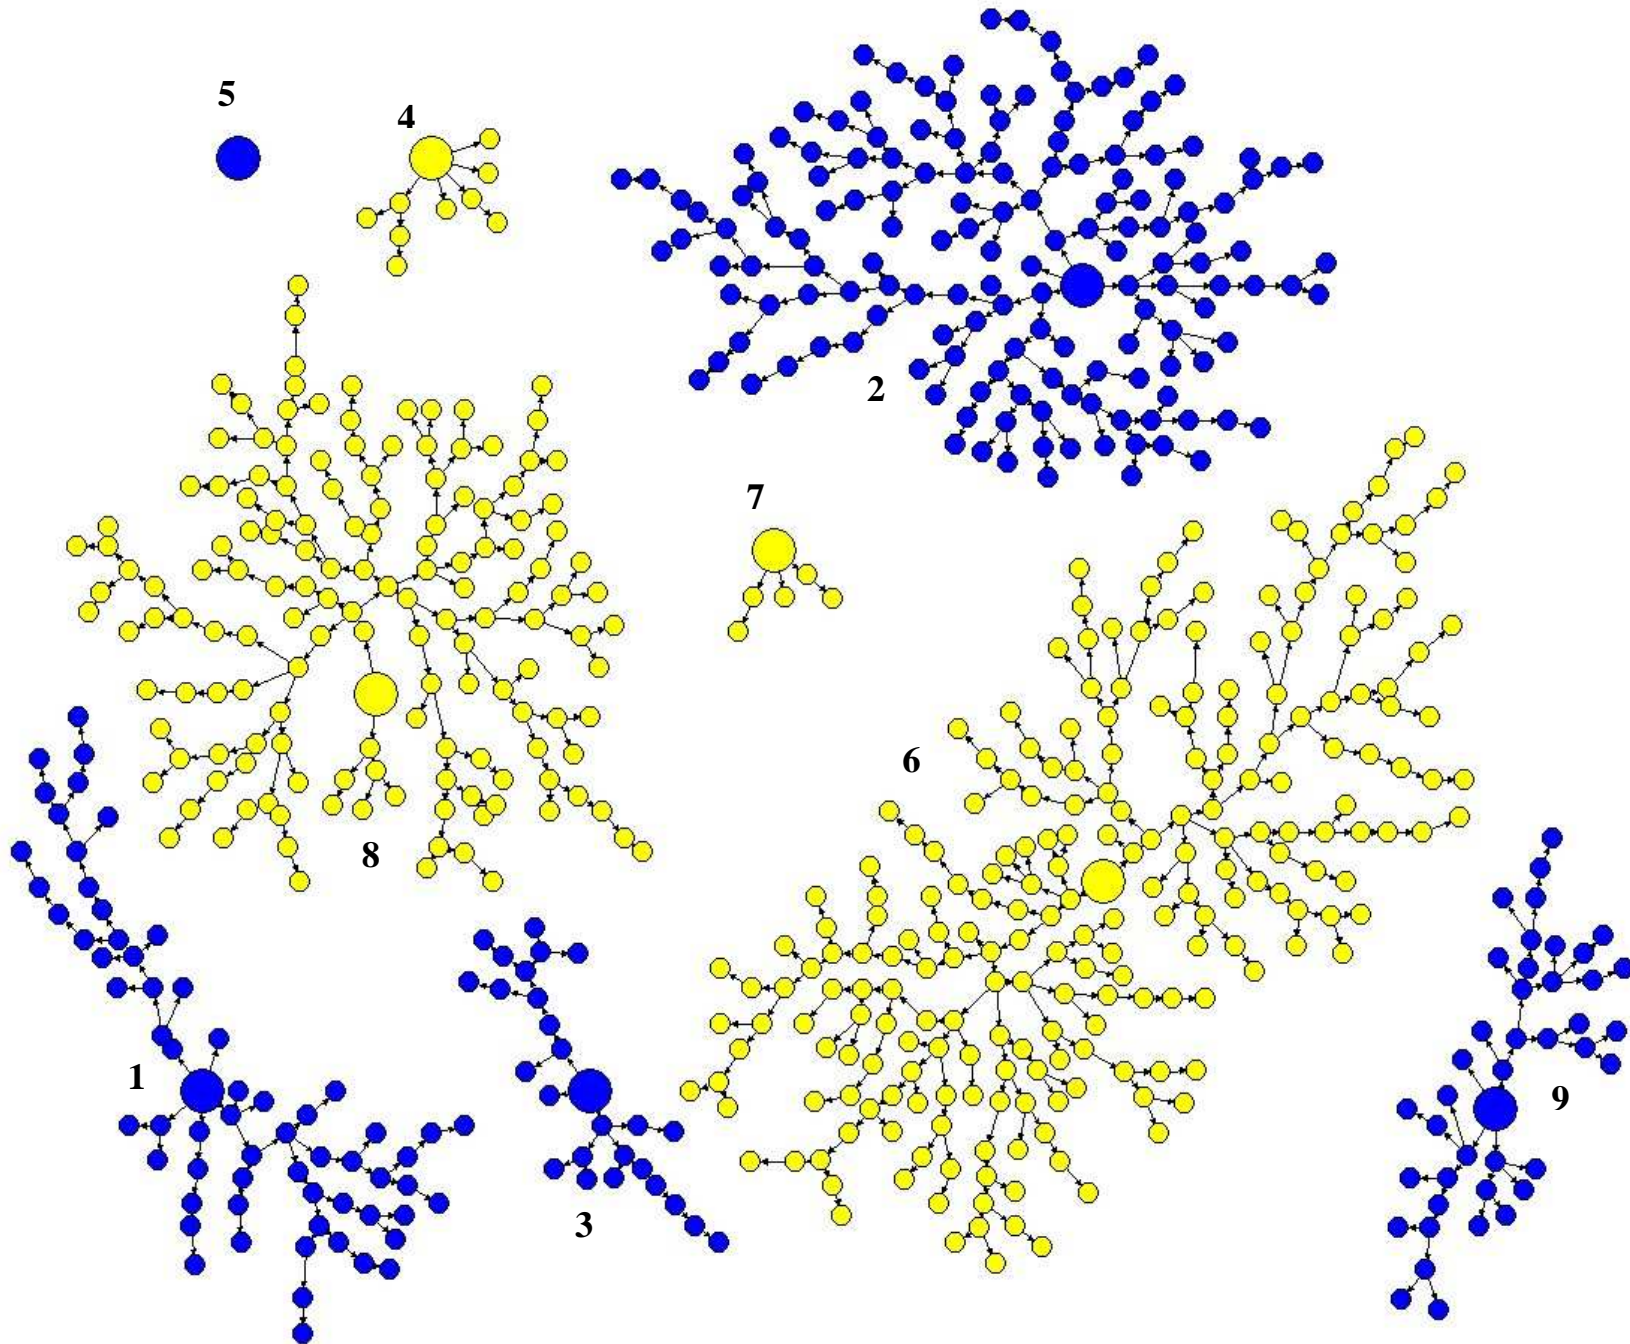



Table S12: Comparing sociodemographics and drug related variables between groups defined by recruitment chain among Seattle-area participants in the 2011 NHBS-IDU3 survey: **Fourth randomization**

|                                  | <b>Group 1</b>               |           | <b>Group 2</b>               |           | <b>Statistical tests</b> |                                              |
|----------------------------------|------------------------------|-----------|------------------------------|-----------|--------------------------|----------------------------------------------|
|                                  | RDS-<br>adjusted<br>estimate | 95% C.I.  | RDS-<br>adjusted<br>estimate | 95% C.I.  | p-value                  | Non-<br>overlapping<br>95% C.I. <sup>a</sup> |
| <b>Age</b>                       | <b>(Percentages)</b>         |           |                              |           |                          |                                              |
| 18 – 29                          | 14                           | (7 - 23)  | 14                           | (8 - 21)  | .81                      |                                              |
| 30 – 39                          | 22                           | (15 - 29) | 23                           | (16 - 31) |                          |                                              |
| 40 – 49                          | 26                           | (19 - 35) | 23                           | (16 - 30) |                          |                                              |
| ≥ 50                             | 38                           | (28 - 48) | 40                           | (31 - 49) |                          |                                              |
| <b>Race</b>                      |                              |           |                              |           | .36                      |                                              |
| White                            | 55                           | (44 - 65) | 48                           | (38 - 59) |                          |                                              |
| Black                            | 24                           | (14 - 34) | 27                           | (17 - 39) |                          |                                              |
| Hispanic                         | 6                            | (3 - 11)  | 9                            | (5 - 13)  |                          |                                              |
| Other race                       | 4                            | (1 - 7)   | 4                            | (2 - 8)   |                          |                                              |
| Multiple races                   | 11                           | (7 - 16)  | 11                           | (7 - 17)  |                          |                                              |
| <b>Sex</b>                       |                              |           |                              |           | .85                      |                                              |
| Male                             | 60                           | (49 - 70) | 59                           | (50 - 68) |                          |                                              |
| Female                           | 40                           | (31 - 51) | 41                           | (32 - 50) |                          |                                              |
| <b>Area of residence</b>         |                              |           |                              |           | .004                     |                                              |
| North Seattle                    | 14                           | (8 - 21)  | 26                           | (17 - 35) |                          |                                              |
| Downtown Seattle                 | 40                           | (29 - 50) | 35                           | (25 - 45) |                          |                                              |
| South Seattle                    | 31                           | (21 - 41) | 24                           | (17 - 33) |                          |                                              |
| South King County                | 12                           | (5 - 22)  | 13                           | (6 - 20)  |                          |                                              |
| East King County                 | 3                            | (1 - 6)   | 3                            | (1 - 6)   |                          |                                              |
| <b>Education</b>                 |                              |           |                              |           | .76                      |                                              |
| < High school grad.              | 24                           | (16 - 32) | 26                           | (19 - 33) |                          |                                              |
| High school grad.                | 41                           | (32 - 50) | 39                           | (31 - 46) |                          |                                              |
| Post high school                 | 35                           | (27 - 44) | 36                           | (28 - 44) |                          |                                              |
| <b>Primary injection drug</b>    |                              |           |                              |           | .01                      |                                              |
| Heroin                           | 79                           | (67 - 88) | 85                           | (75 - 92) |                          |                                              |
| Speedballs                       | 2                            | (1 - 4)   | 5                            | (2 - 8)   |                          |                                              |
| Cocaine                          | 2                            | (0 - 5)   | 2                            | (0 - 5)   |                          |                                              |
| Amphetamines                     | 17                           | (8 - 29)  | 9                            | (3 - 17)  |                          |                                              |
| <b>Shared Needle<sup>b</sup></b> |                              |           |                              |           | .004                     |                                              |
| No                               | 77                           | (71 - 83) | 67                           | (60 - 75) |                          |                                              |
| Yes                              | 23                           | (17 - 29) | 33                           | (25 - 40) |                          |                                              |
| <b>Shared Cooker<sup>b</sup></b> |                              |           |                              |           | .001                     |                                              |
| No                               | 56                           | (46 - 64) | 45                           | (36 - 54) |                          |                                              |
| Yes                              | 45                           | (36 - 54) | 55                           | (46 - 64) |                          |                                              |
| <b>Backloaded<sup>b</sup></b>    |                              |           |                              |           | .06                      |                                              |
| No                               | 81                           | (75 - 86) | 71                           | (63 - 78) |                          |                                              |
| Yes                              | 19                           | (14 - 25) | 29                           | (22 - 37) |                          |                                              |
| <b>N (total)</b>                 | 397                          |           | 291                          |           |                          |                                              |

<sup>a</sup> There were no overlapping 95% confidence intervals between groups in the 4<sup>th</sup> randomization.

<sup>b</sup> Previous 12 months.

Table S13: Comparing sexual, HIV and HCV- related variables between randomly assigned groups defined by recruitment chain among Seattle-area participants in the 2011 NHBS-IDU3 survey: **Fourth randomization**

|                                                      | Group 1                      |           | Group 2                      |           | Statistical tests    |                                 |
|------------------------------------------------------|------------------------------|-----------|------------------------------|-----------|----------------------|---------------------------------|
|                                                      | RDS-<br>adjusted<br>estimate | 95% C.I.  | RDS-<br>adjusted<br>estimate | 95% C.I.  | p-value              | Non-<br>overlapping<br>95% C.I. |
| <b>Male-to-male sex<sup>a</sup></b>                  | <b>(Percentages)</b>         |           |                              |           |                      |                                 |
| No                                                   | 85                           | (76 - 93) | 93                           | (87 - 98) | 5 x 10 <sup>-4</sup> |                                 |
| Yes                                                  | 15                           | (7 - 24)  | 7                            | (2 - 13)  |                      |                                 |
| <b>Number sex partners<sup>a</sup></b>               |                              |           |                              |           |                      |                                 |
| 0                                                    | 20                           | (12 - 28) | 15                           | (9 - 20)  | .48                  |                                 |
| 1                                                    | 40                           | (33 - 51) | 39                           | (31 - 49) |                      |                                 |
| 2 - 4                                                | 27                           | (20 - 33) | 32                           | (24 - 40) |                      |                                 |
| 5 - 9                                                | 7                            | (4 - 11)  | 8                            | (5 - 12)  |                      |                                 |
| 10 +                                                 | 6                            | (3 - 9)   | 6                            | (3 - 10)  |                      |                                 |
| <b>Unprotected, non-concordant sex<sup>a,b</sup></b> |                              |           |                              |           |                      |                                 |
| No                                                   | 75                           | (68 - 82) | 76                           | (69 - 82) | .76                  |                                 |
| Yes                                                  | 25                           | (19 - 33) | 24                           | (18 - 31) |                      |                                 |
| <b>HIV test, 12 months</b>                           |                              |           |                              |           |                      |                                 |
| No                                                   | 51                           | (42 - 61) | 62                           | (52 - 70) | .01                  |                                 |
| Yes                                                  | 49                           | (39 - 58) | 39                           | (30 - 48) |                      |                                 |
| <b>HIV test, 3 months</b>                            |                              |           |                              |           |                      |                                 |
| No                                                   | 82                           | (75 - 87) | 87                           | (80 - 92) | .10                  |                                 |
| Yes                                                  | 18                           | (13 - 25) | 13                           | (8 - 20)  |                      |                                 |
| <b>Serologic HIV status</b>                          |                              |           |                              |           |                      |                                 |
| Negative                                             | 90                           | (80 - 98) | 87                           | (77 - 97) | .35                  |                                 |
| Positive                                             | 10                           | (2 - 20)  | 13                           | (3 - 23)  |                      |                                 |
| <b>Serologic HCV status</b>                          |                              |           |                              |           |                      |                                 |
| Negative                                             | 29                           | (21 - 37) | 32                           | (22 - 42) | .45                  |                                 |
| Positive                                             | 71                           | (63 - 79) | 68                           | (58 - 78) |                      |                                 |
| N (total)                                            | 397                          |           | 291                          |           |                      |                                 |

<sup>a</sup> Previous 12 months

<sup>b</sup> Vaginal or anal sex without a condom with a partner of unknown HIV status or a status opposite to that of the participant.



Table S14: Details of Randomization by recruitment chain procedure:  
 Seattle area participants in the 2011 NBHS IDU3 survey: **Fifth randomization**

| Recruitment chain | N participants | N Waves | Random number | Cumulative number group 1 | Cumulative number group 2 | Difference group1:group2 |         |
|-------------------|----------------|---------|---------------|---------------------------|---------------------------|--------------------------|---------|
| 6                 | 229            | 15      | .11           | 229                       | 459                       | 230                      | Group 1 |
| 8                 | 152            | 14      | .15           | 381                       | 307                       | 74                       |         |
| 2                 | 156            | 13      | .42           | 537                       | 151                       | 386                      | Group 2 |
| 9                 | 42             | 8       | .43           | 579                       | 109                       | 470                      |         |
| 1                 | 65             | 12      | .50           | 644                       | 44                        | 600                      |         |
| 7                 | 6              | 2       | .60           | 650                       | 38                        | 612                      |         |
| 4                 | 10             | 3       | .60           | 660                       | 28                        | 632                      |         |
| 5                 | 1              | 0       | .77           | 661                       | 27                        | 634                      |         |
| 3                 | 27             | 7       | .99           | 688                       | 0                         | 688                      |         |

Figure S4: Random groups defined by recruitment chains among Seattle-area participants in the 2012 NBHS IDU survey, **Fifth randomization:**  
Yellow = Group 1; Blue = Group 2; Enlarged circles = seeds; Numbers = Recruitment chain

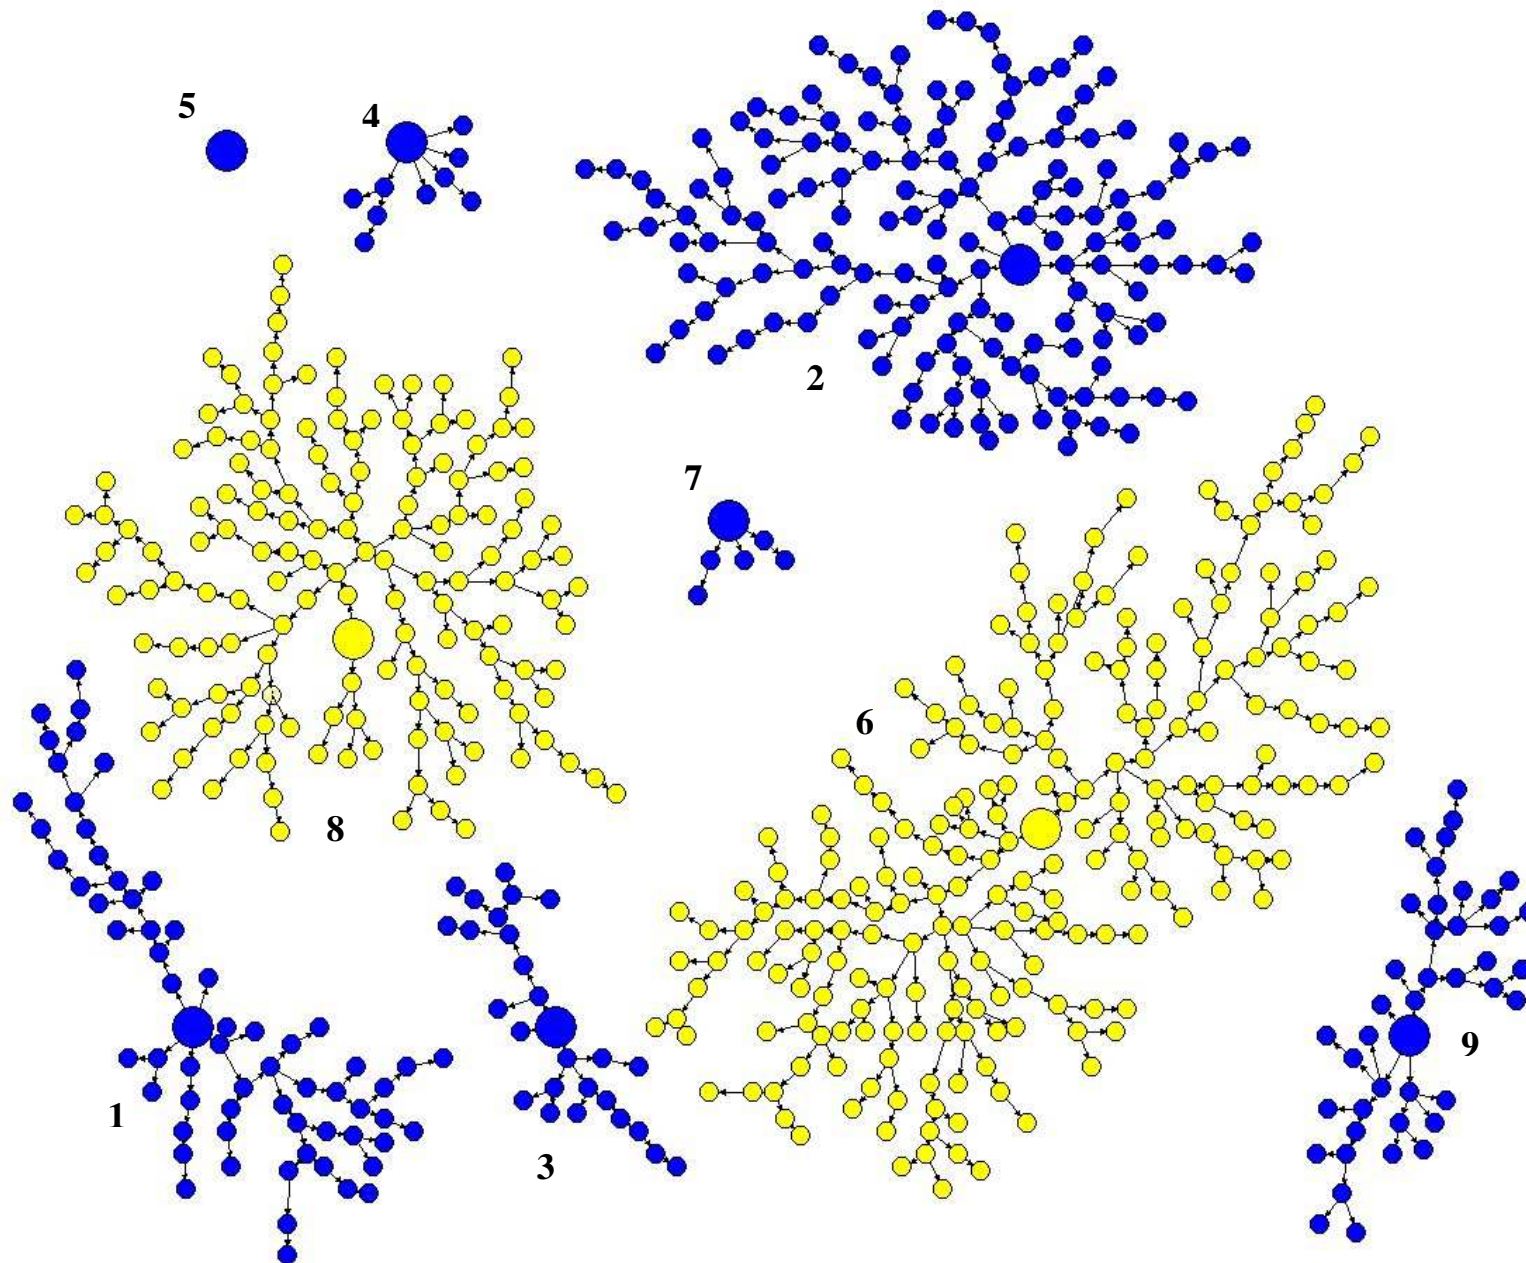

Table S15: Comparing sociodemographics and drug related variables between groups defined by recruitment chain among Seattle-area participants in the 2011 NHBS-IDU3 survey: **Fifth randomization**

|                                           | <b>Group 1</b>               |           | <b>Group 2</b>               |           | <b>Statistical tests</b> |                                              |
|-------------------------------------------|------------------------------|-----------|------------------------------|-----------|--------------------------|----------------------------------------------|
|                                           | RDS-<br>adjusted<br>estimate | 95% C.I.  | RDS-<br>adjusted<br>estimate | 95% C.I.  | p-value                  | Non-<br>overlapping<br>95% C.I. <sup>a</sup> |
| <b>Age</b>                                | <b>(Percentages)</b>         |           |                              |           |                          |                                              |
| 18 – 29                                   | 14                           | (7 - 23)  | 14                           | (8 - 21)  | .94                      |                                              |
| 30 – 39                                   | 22                           | (16 - 30) | 22                           | (15 - 30) |                          |                                              |
| 40 – 49                                   | 24                           | (18 - 31) | 26                           | (17 - 36) |                          |                                              |
| ≥ 50                                      | 40                           | (29 - 50) | 38                           | (29 - 48) |                          |                                              |
| <b>Race</b>                               |                              |           |                              |           | .34                      |                                              |
| White                                     | 54                           | (43 - 64) | 51                           | (39 - 62) |                          |                                              |
| Black                                     | 25                           | (15 - 36) | 25                           | (15 - 37) |                          |                                              |
| Hispanic                                  | 6                            | (4 - 11)  | 8                            | (5 - 12)  |                          |                                              |
| Other race                                | 3                            | (1 - 5)   | 5                            | (2 - 10)  |                          |                                              |
| Multiple races                            | 12                           | (8 - 17)  | 10                           | (6 - 16)  |                          |                                              |
| <b>Sex</b>                                |                              |           |                              |           | .61                      |                                              |
| Male                                      | 59                           | (48 - 69) | 61                           | (51 - 70) |                          |                                              |
| Female                                    | 41                           | (32 - 52) | 40                           | (30 - 49) |                          |                                              |
| <b>Area of residence</b>                  |                              |           |                              |           | .004                     |                                              |
| North Seattle                             | 15                           | (9 - 23)  | 23                           | (15 - 33) |                          |                                              |
| Downtown Seattle                          | 37                           | (28 - 48) | 39                           | (27 - 51) |                          |                                              |
| South Seattle                             | 33                           | (23 - 44) | 22                           | (15 - 31) |                          |                                              |
| South King County                         | 11                           | (4 - 21)  | 14                           | (7 - 22)  |                          |                                              |
| East King County                          | 4                            | (1 - 7)   | 3                            | (1 - 5)   |                          |                                              |
| <b>Education</b>                          |                              |           |                              |           | .63                      |                                              |
| < High school grad.                       | 25                           | (17 - 34) | 24                           | (17 - 31) |                          |                                              |
| High school grad.                         | 39                           | (30 - 47) | 42                           | (33 - 52) |                          |                                              |
| Post high school                          | 37                           | (28 - 45) | 34                           | (26 - 43) |                          |                                              |
| <b>Primary injection drug<sup>b</sup></b> |                              |           |                              |           | .51                      |                                              |
| Heroin                                    | 83                           | (76 - 90) | 80                           | (68 - 91) |                          |                                              |
| Speedballs                                | 3                            | (1 - 5)   | 4                            | (2 - 7)   |                          |                                              |
| Cocaine                                   | 2                            | (0 - 5)   | 2                            | (0 - 5)   |                          |                                              |
| Amphetamines                              | 12                           | (6 - 19)  | 14                           | (5 - 26)  |                          |                                              |
| <b>Shared Needle<sup>b</sup></b>          |                              |           |                              |           | .07                      |                                              |
| No                                        | 76                           | (70 - 82) | 70                           | (62 - 78) |                          |                                              |
| Yes                                       | 24                           | (18 - 31) | 30                           | (22 - 38) |                          |                                              |
| <b>Shared Cooker<sup>b</sup></b>          |                              |           |                              |           | .06                      |                                              |
| No                                        | 54                           | (45 - 62) | 48                           | (38 - 59) |                          |                                              |
| Yes                                       | 46                           | (38 - 55) | 52                           | (41 - 62) |                          |                                              |
| <b>Backloaded<sup>b</sup></b>             |                              |           |                              |           | .08                      |                                              |
| No                                        | 80                           | (74 - 85) | 73                           | (65 - 80) |                          |                                              |
| Yes                                       | 20                           | (15 - 26) | 27                           | (20 - 35) |                          |                                              |
| <b>N (total)</b>                          | 381                          |           | 307                          |           |                          |                                              |

<sup>a</sup> There were no overlapping 95% confidence intervals between groups in the 5<sup>th</sup> randomization.

<sup>b</sup> Previous 12 months.

Table S16: Comparing sexual, HIV and HCV- related variables between randomly assigned groups defined by recruitment chain among Seattle-area participants in the 2011 NHBS-IDU3 survey: **Fifth randomization**

|                                                      | Group 1                      |           | Group 2                      |           | Statistical tests    |                                 |  |
|------------------------------------------------------|------------------------------|-----------|------------------------------|-----------|----------------------|---------------------------------|--|
|                                                      | RDS-<br>adjusted<br>estimate | 95% C.I.  | RDS-<br>adjusted<br>estimate | 95% C.I.  | p-value              | Non-<br>overlapping<br>95% C.I. |  |
| <b>Male-to-male sex<sup>a</sup></b>                  | <b>(Percentages)</b>         |           |                              |           |                      |                                 |  |
| No                                                   | 89                           | (84 - 94) | 88                           | (75 - 97) | .80                  |                                 |  |
| Yes                                                  | 11                           | (6 - 16)  | 12                           | (3 - 25)  |                      |                                 |  |
| <b>Number sex partners</b>                           |                              |           |                              |           |                      |                                 |  |
| 0                                                    | 21                           | (13 - 30) | 14                           | (8 - 19)  | .12                  |                                 |  |
| 1                                                    | 39                           | (31 - 49) | 41                           | (32 - 52) |                      |                                 |  |
| 2 - 4                                                | 27                           | (20 - 33) | 32                           | (24 - 41) |                      |                                 |  |
| 5 - 9                                                | 7                            | (4 - 12)  | 7                            | (4 - 11)  |                      |                                 |  |
| 10 +                                                 | 6                            | (3 - 10)  | 6                            | (3 - 9)   |                      |                                 |  |
| <b>Unprotected, non-concordant sex<sup>a,b</sup></b> |                              |           |                              |           |                      |                                 |  |
| No                                                   | 74                           | (66 - 80) | 78                           | (71 - 84) | .19                  |                                 |  |
| Yes                                                  | 26                           | (20 - 34) | 22                           | (16 - 29) |                      |                                 |  |
| <b>HIV test, 12 months</b>                           |                              |           |                              |           |                      |                                 |  |
| No                                                   | 51                           | (42 - 61) | 62                           | (53 - 71) | .005                 |                                 |  |
| Yes                                                  | 49                           | (39 - 58) | 38                           | (30 - 47) |                      |                                 |  |
| <b>HIV test, 3 months</b>                            |                              |           |                              |           |                      |                                 |  |
| No                                                   | 82                           | (74 - 87) | 87                           | (80 - 92) | .09                  |                                 |  |
| Yes                                                  | 19                           | (13 - 26) | 13                           | (8 - 20)  |                      |                                 |  |
| <b>Serologic HIV status</b>                          |                              |           |                              |           |                      |                                 |  |
| Negative                                             | 94                           | (88 - 98) | 83                           | (69 - 96) | 3 x 10 <sup>-6</sup> |                                 |  |
| Positive                                             | 6                            | (2 - 12)  | 17                           | (5 - 31)  |                      |                                 |  |
| <b>Serologic HCV status</b>                          |                              |           |                              |           |                      |                                 |  |
| Negative                                             | 30                           | (22 - 38) | 31                           | (22 - 40) | .83                  |                                 |  |
| Positive                                             | 70                           | (62 - 79) | 70                           | (60 - 78) |                      |                                 |  |
| N (total)                                            | 381                          |           | 307                          |           |                      |                                 |  |

<sup>a</sup> Previous 12 months

<sup>b</sup> Vaginal or anal sex without a condom with a partner of unknown HIV status or a status opposite to that of the participant.
